# Supplementary material
Source: HighWire-hosted journal article supplement (https://jnm.snmjournals.org/highwire/filestream/93939/field_highwire_adjunct_files/3/48207_suppl_tables_and_fig_legends.pdf)
Supplement: 48207_suppl_tables_and_fig_legends.pdf [file 48207_suppl_tables_and_fig_legends.pdf]

Supplemental Table 1: Summary of the concordance of the localization investigations with the final comprehensive epilepsy program (CEP) localization in 176 patients who underwent pre-surgical evaluation for medically refractory focal epilepsy.

| Concordance with CEP localization | FDG-PET<br>(n=176) | MRI<br>(n=176) | Video-EEG monitoring<br>(n=172) | Intracranial EEG (n=16) | Ictal-Interictal SPECT<br>(n=15) |
|-----------------------------------|--------------------|----------------|---------------------------------|-------------------------|----------------------------------|
| Concordant localization           | 109 (61.9%)        | 59 (33.5%)     | 100 (58.1%)                     | 15 (93.8%)              | 8 (53.3%)                        |
| Non-concordant localization       | 4 (2.3%)           | 2 (1.1%)       | 3 (1.7%)                        | -                       | 1 (6.7%)                         |
| Test localizing, CEP unlocalizing | 18 (2.2%)          | 2 (1.1%)       | 4 (2.3%)                        | -                       | -                                |
| Test unlocalizing, CEP localizing | 43 (24.4%)         | 71 (40.3%)     | 29 (16.9%)                      | -                       | 4 (26.7%)                        |
| Neither localizing                | 2 (1.1%)           | 42 (23.9%)     | 36 (20.9%)                      | 1 (6.3%)                | 2 (13.3%)                        |

Supplemental Table 2: The health impact of having a localizing MRI and/or VEM with regard to post-surgical outcome.

|                                   | Class I/II<br>outcomes | Class III/IV<br>outcomes | Not operated | Total |
|-----------------------------------|------------------------|--------------------------|--------------|-------|
| Both localizing and concordant    | 21 (53.8%)             | 6 (15.4%)                | 12 (30.8%)   | 39    |
| One localizing or non-concordant* | 25 (27.8%)             | 9 (10%)                  | 56 (62.2%)   | 90    |
| Neither localizing or concordant  | 0 (0%)                 | 2 (4.7%)                 | 41 (95.3%)   | 43    |
| Total                             | 46 (26.7%)             | 17 (9.9%)                | 109 (63.4%)  | 172   |

Key: \*non-concordant localization with the comprehensive epilepsy program (CEP) localization

Supplemental Table 3: The diagnostic performance of PET and health impact with regard to surgical outcome when either VEM or MRI were non-localizing or gave non-concordant localization\*.

|                    | Class I/II<br>outcomes | Class III/IV<br>outcomes | Not operated | Total |
|--------------------|------------------------|--------------------------|--------------|-------|
| PET localizing     | 24 (32.9%)             | 6 (8.2%)                 | 43 (58.9%)   | 73    |
| PET non-localizing | 1 (5.9%)               | 3 (17.6%)                | 13 (76.5%)   | 17    |
| Total              | 25 (27.8%)             | 9 (10%)                  | 56 (62.2%)   | 90    |

Key: \*non-concordant localization with the comprehensive epilepsy program (CEP) localization

## **LEGENDS FOR FIGURES**

### **Supplemental Figure 1:**

Coronal, axial and sagittal FDG-PET images from a patient with **A.** temporal lobe epilepsy and **B.** extratemporal lobe epilepsy (occipital) showing the images views and colour table used for routine reporting of the PET studies. Both patients had normal MRI, but focal hypometabolism detected on the FDG-PET, which was critical in the patients being able to proceed to having epilepsy surgery.

### **Supplemental Figure 2:**

Decision tree analysis as represented by Extend Software using blocks from the Crump Institute. A baseline strategy of medical treatment for all patients was compared to three imaging strategies a) patients are investigated with VEM and MRI only, b) ictal SPECT for patients with an indeterminate VEM/MRI result, and c) inter-ictal PET for patients with an indeterminate VEM/MRI result.
